# Supplementary material for: Analysis of cytochrome b5 reductase-mediated metabolism in the phytopathogenic fungus Zymoseptoria tritici reveals novel functionalities implicated in virulence
Source: PubMed Central journal article supplement (PMC4557397; doi:10.1016/j.fgb.2015.05.008), 2015-09
Supplement: mmc1.pdf [file mmc1.pdf]

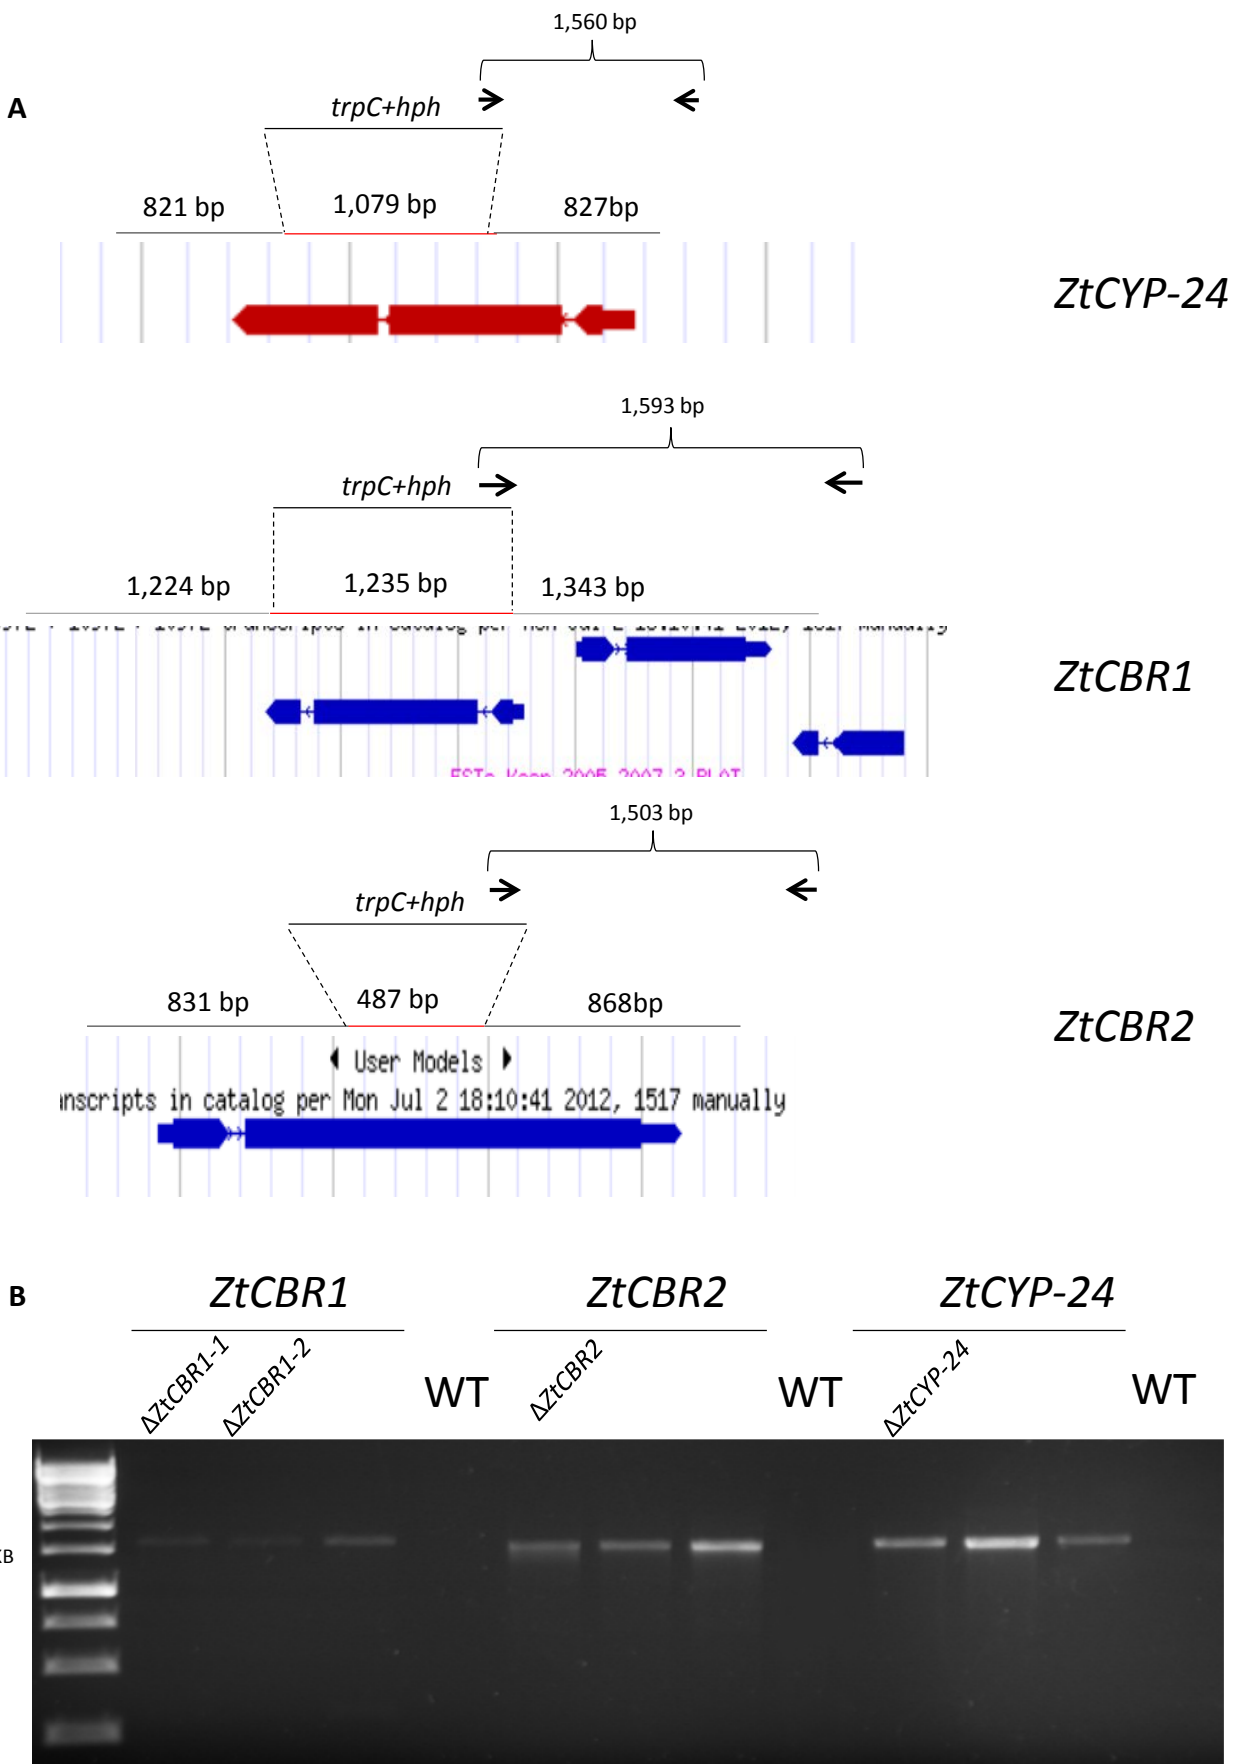

**Supplementary Figure 1. Targeted gene disruption strategy and confirmation.** (A) Positions

of flanking sequences relative to the genes of interest in the *Z. tritici* genome, sizes of

flanking sequences and sizes of regions to be replaced by the hygromycin resistance

cassette under a *trpC* promoter (*trpC+hph*). Primers used for confirmation of successful

gene disruption are marked with arrows and amplicon size is indicated above. (B)

Confirmation of integration of *trpC+hph* at the correct location in the correct orientation

using a primer from within *hph* and primer from within 200 bp of genomic DNA adjacent to

one of the flanking sequences used to guide insertion. A single band of the correct amplicon

size is indicative of successful gene targeting. WT gDNA was used as a control. Strains taken

forward for further studies and their names are indicated above the relevant PCR lanes.

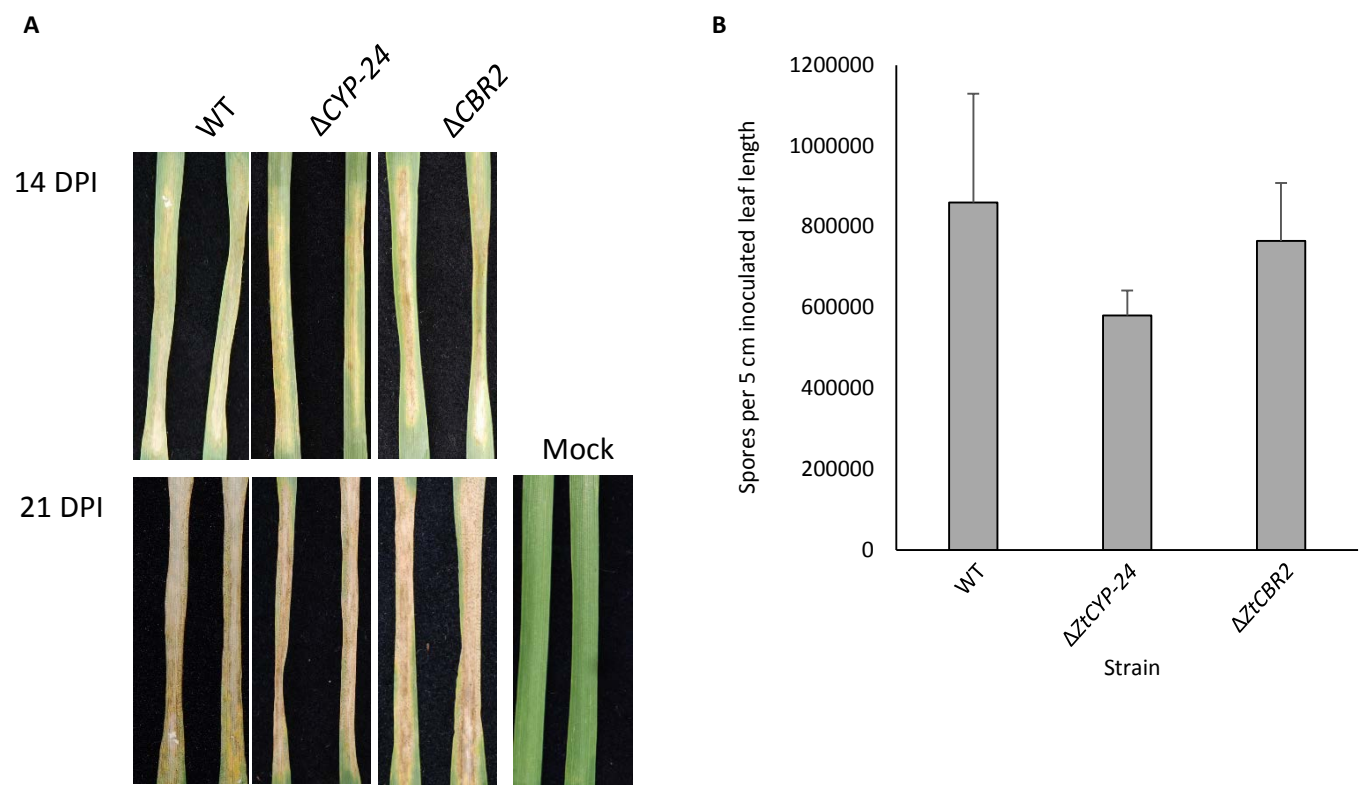

**Supplementary Figure 2. Wheat leaf infection assays with  $\Delta$ ZtCYP-24 and  $\Delta$ ZtCBR2 strains**

(A) Leaves infected with WT,  $\Delta$ ZtCYP-24 and  $\Delta$ ZtCBR2 after 14 and 21 DPI; mock-inoculated control leaves at 21 DPI are shown to the right. A total of 12 leaves per strain/mock were inoculated and two representative leaves are shown. (B) Mean number of spores (recovered by washing) per 5 cm length of inoculated leaf for WT,  $\Delta$ ZtCYP-24 and  $\Delta$ ZtCBR2.

| Primer name    | Sequence                                          | Use                                                                       | Restriction site |
|----------------|---------------------------------------------------|---------------------------------------------------------------------------|------------------|
| NB5.5-1F       | aaaagatctTTGTCATTGCTGAGCCTGTGT                    | Amplification of flanking sequence NB5.5-1 for targeting <i>Ztcb1</i>     | BglII            |
| NB5.5-1R       | aaaggcgcaccactagTACTGCTGGAGA GACTCTGCG            | Amplification of flanking sequence NB5.5-1 for targeting <i>Ztcb1</i>     | SpeI             |
| NB5.3-1F       | aaaggcgcaccactCTGTGGTCTCCTCTATGGTT                | Amplification of flanking sequence NB5.3-1 for targeting <i>Ztcb1</i>     | NarI             |
| NB5.3-1R       | aaaggcgcaccCAGGCCAAAAAGGCGCTATGA                  | Amplification of flanking sequence NB5.3-1 for targeting <i>Ztcb1</i>     | SgsI             |
| HYG-N1F        | aaaactagTATATTGAAGGAGCATTTTTTGG                   | Amplification of hygromycin resistance cassette to clone into pNOV2114    | SpeI             |
| HYG-N1R        | aaaggcgcctACTACTATTTCCTTTGCCCTCG                  | Amplification of hygromycin resistance cassette to clone into pNOV2114    | NarI             |
| CBR2 F1 F      | aagagctcACGATGAACGATCGGTTT CATCACGATG CTACGGTTTTG | Amplification of flanking sequence CBR2F1 for targeting <i>Ztcb2</i>      | SacI             |
| CBR2 F1 R      | aaggtaccAAGTGAATTGCAGCCAC GCA                     | Amplification of flanking sequence CBR2F1 for targeting <i>Ztcb2</i>      | KpnI             |
| CBR2 F2 F      | aaaagcttGCCGACATTCCGG GTC CCAA                    | Amplification of flanking sequence CBR2F2 for targeting <i>Ztcb2</i>      | HindIII          |
| CBR2 F2 R      | aaactagtCGAGTACCGCGCTTTGGGGG                      | Amplification of flanking sequence CBR2F2 for targeting <i>Ztcb2</i>      | SpeI             |
| CYP-24 F1 F    | aaaagcttATGTGAGAGATCGTGAGTTGTTTGCA                | Amplification of flanking sequence CYP-24F1 for targeting <i>Ztcbp-24</i> | HindIII          |
| CYP-24 F1 R    | aatcttagaGATCAACTTTGCACTGCTAGAAGT GAAGAT          | Amplification of flanking sequence CYP-24F1 for targeting <i>Ztcbp-24</i> | XbaI             |
| CYP-24 F2 F    | aaggtaccGATGACTGCTGTGATCCTCTCGAA                  | Amplification of flanking sequence CYP-24F2 for targeting <i>Ztcbp-24</i> | KpnI             |
| CYP-24 F2 R    | aagagctctTGTCTGAACACCTGGCTTTGCGGT                 | Amplification of flanking sequence CYP-24F2 for targeting <i>Ztcbp-24</i> | SacI             |
| CBR1 + Hyg F   | GCTGATCTGACCCAGTTGCCT                             | CBR1 KO confirmation                                                      |                  |
| CBR1 + Hyg R   | CAATCGTGAGGGGTTCACT                               | CBR1 KO confirmation                                                      |                  |
| CBR2 + Hyg F   | AGTCGTCCAGCGGGTGA GCA                             | CBR2 KO confirmation                                                      |                  |
| CBR2 + Hyg R   | GGCGAAGCTCTCCGGCCATC                              | CBR2 KO confirmation                                                      |                  |
| CYP-24 + Hyg F | AGTCGTCCAGCGGGTGA GCA                             | CYP-24 KO confirmation                                                    |                  |
| CYP-24 + Hyg R | GCCTCCCTGAACTCCCA                                 | CYP-24 KO confirmation                                                    |                  |

**Supplementary Table 1** All primers used in this study with added adenines followed by restriction sites in lower case at the 5' end.

| Fungal genome                                 | URL                                                                                                                                       |
|-----------------------------------------------|-------------------------------------------------------------------------------------------------------------------------------------------|
| <i>Zyloseptoria tritici</i>                   | <a href="http://genome.jgi-psf.org/Mycgr3/Mycgr3.home.html">http://genome.jgi-psf.org/Mycgr3/Mycgr3.home.html</a>                         |
| <i>Ustilago maydis</i>                        | <a href="http://genome.jgi.doe.gov/Ustma1/Ustma1.home.html">http://genome.jgi.doe.gov/Ustma1/Ustma1.home.html</a>                         |
| <i>Stagonospora nodorum</i>                   | <a href="http://genome.jgi.doe.gov/Stano2/Stano2.home.html">http://genome.jgi.doe.gov/Stano2/Stano2.home.html</a>                         |
| <i>Puccinia graminis</i>                      | <a href="http://genome.jgi-psf.org/Pucgr1/Pucgr1.home.html">http://genome.jgi-psf.org/Pucgr1/Pucgr1.home.html</a>                         |
| <i>Piriformospora indica</i>                  | <a href="http://genome.jgi-psf.org/Pirin1/Pirin1.home.html">http://genome.jgi-psf.org/Pirin1/Pirin1.home.html</a>                         |
| <i>Neurospora tetrasperma</i>                 | <a href="http://genome.jgi-psf.org/Neute_matA2/Neute_matA2.home.html">http://genome.jgi-psf.org/Neute_matA2/Neute_matA2.home.html</a>     |
| <i>Neurospora crassa</i>                      | <a href="http://genome.jgi-psf.org/Neucr2/Neucr2.home.html">http://genome.jgi-psf.org/Neucr2/Neucr2.home.html</a>                         |
| <i>Mycosphaerella fijiensis</i>               | <a href="http://genome.jgi.doe.gov/Mycfi2/Mycfi2.home.html">http://genome.jgi.doe.gov/Mycfi2/Mycfi2.home.html</a>                         |
| <i>Fusarium graminearum</i>                   | <a href="http://genome.jgi.doe.gov/Fusgr1/Fusgr1.home.html">http://genome.jgi.doe.gov/Fusgr1/Fusgr1.home.html</a>                         |
| <i>Dothistroma septosporum</i>                | <a href="http://genome.jgi-psf.org/Dotse1/Dotse1.home.html">http://genome.jgi-psf.org/Dotse1/Dotse1.home.html</a>                         |
| <i>Colletotrichum graminicola</i>             | <a href="http://genome.jgi-psf.org/Colgr1/Colgr1.home.html">http://genome.jgi-psf.org/Colgr1/Colgr1.home.html</a>                         |
| <i>Cochliobolus sativus</i>                   | <a href="http://genome.jgi.doe.gov/Cocsa1/Cocsa1.home.html">http://genome.jgi.doe.gov/Cocsa1/Cocsa1.home.html</a>                         |
| <i>Cochliobolus heterostrophus</i>            | <a href="http://genomeportal.jgi-psf.org/CocheC5_3/CocheC5_3.home.html">http://genomeportal.jgi-psf.org/CocheC5_3/CocheC5_3.home.html</a> |
| <i>Blumeria graminis</i> f. sp. <i>hordei</i> | <a href="http://genome.jgi.doe.gov/Blugr1/Blugr1.home.html">http://genome.jgi.doe.gov/Blugr1/Blugr1.home.html</a>                         |
| <i>Aspergillus terreus</i>                    | <a href="http://genome.jgi.doe.gov/Aspte1/Aspte1.home.html">http://genome.jgi.doe.gov/Aspte1/Aspte1.home.html</a>                         |
| <i>Aspergillus nidulans</i>                   | <a href="http://genome.jgi.doe.gov/Aspnid1/Aspnid1.home.html">http://genome.jgi.doe.gov/Aspnid1/Aspnid1.home.html</a>                     |
| <i>Aspergillus fumigatus</i>                  | <a href="http://genome.jgi.doe.gov/Aspfu1/Aspfu1.home.html">http://genome.jgi.doe.gov/Aspfu1/Aspfu1.home.html</a>                         |

**Supplementary Table 2** URLs of all genome sequences incorporated into genome-wide analysis of *CBR* genes.
